# Supplementary material for: Comparison among amoA Primers Suited for Quantification and Diversity Analyses of Ammonia-Oxidizing Bacteria in Soil
Source: PubMed Central journal article supplement (PMC4036032; doi:10.1264/jsme2.me11230), 2011-11-10
Supplement: 27_94_s1.pdf [file 27_94_s1.pdf]

### **Legends of Figures**

Fig. S1: Amplification positions of *amoA* from *Nitrosospira multiformis* ATCC 25196 (accession number CP000103) for construction of *amoA* clones.

Fig. S2: DGGE band patterns of *amoA* fragments retrieved from gray lowland soil and andosol using the three primers at four different annealing temperatures.

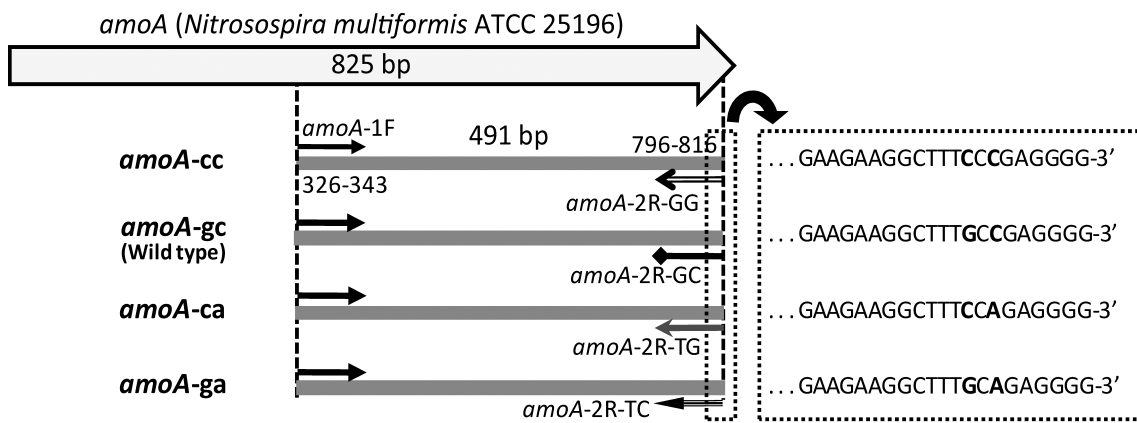

Shimomura et al. Figure S1

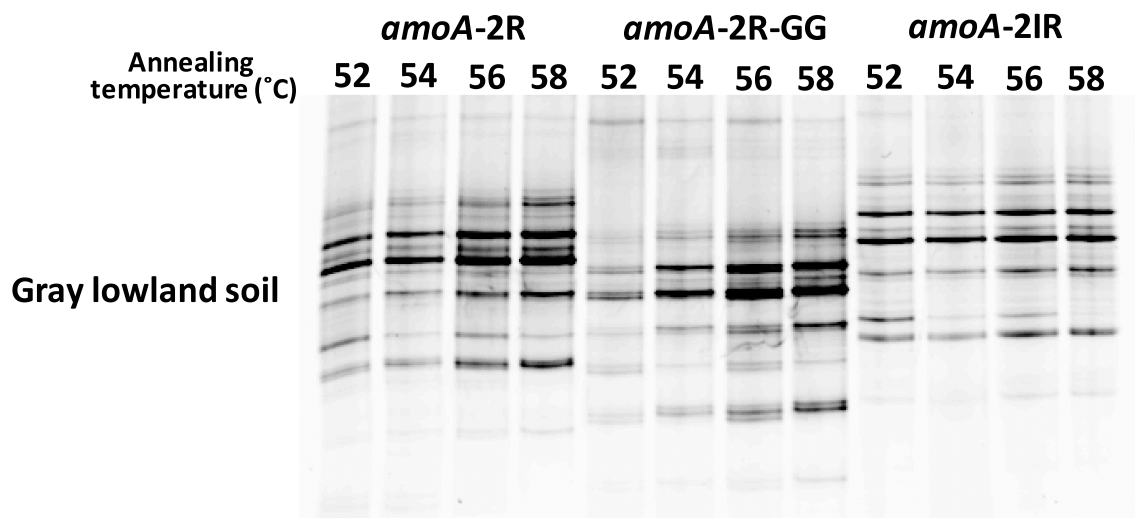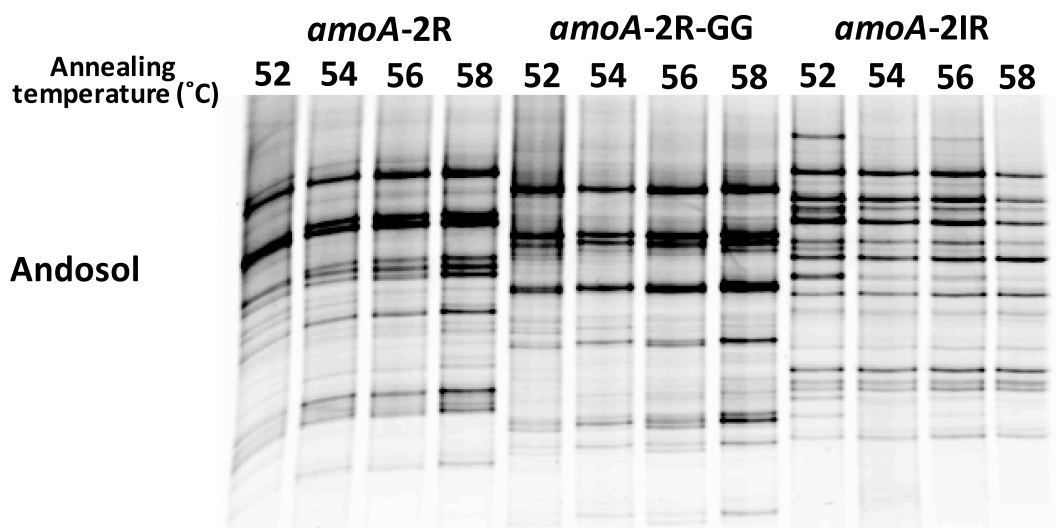

Shimomura et al. Figure S2

**Table S1.** PCR primers for the amplification of *amoA* gene fragments having complementary sequences with *amoA*-2R.

|         | Primer             | Sequence (5'-3')      | T <sub>m</sub> (°C) | Reference |
|---------|--------------------|-----------------------|---------------------|-----------|
| Forward | <i>amoA</i> -1F    | GGGGTTTCTACTGGTGGT    | 46.5                | (26)      |
| Reverse | <i>amoA</i> -2R-GG | CCCCTCGGGAAAGCCTTCTTC | 54.4                | (20)      |
|         | <i>amoA</i> -2R-GC | CCCCTCGGCAAAGCCTTCTTC | 54.4                | (20)      |
|         | <i>amoA</i> -2R-TG | CCCCTCTGGAAAGCCTTCTTC | 52.5                | (20)      |
|         | <i>amoA</i> -2R-TC | CCCCTCTGCAAAGCCTTCTTC | 52.5                | (20)      |

**Table S2.** PCR conditions used in this study for the amplification of *amoA* gene fragments.

| Experiment                      | Template                                                  | Composition of reaction mixture                                                                                                                                                                     | Thermocycling conditions                                                                                     |
|---------------------------------|-----------------------------------------------------------|-----------------------------------------------------------------------------------------------------------------------------------------------------------------------------------------------------|--------------------------------------------------------------------------------------------------------------|
| Construction of standard clones | <i>Nitrosospira multiformis</i><br>ATCC 25196 <i>amoA</i> | 25 µL of Premix Ex Taq™ Hot Start Version (Takara, Kyoto, Japan), 2 µL of 10 µM each primer (shown in Table S1), 1 µL of template (including 10 <sup>5</sup> <i>amoA</i> copies), and 20 µL of SDW. | 2 min at 94°C, followed by 30 cycles at 94°C for 30 s, at 54°C for 30 s, and at 72°C for 30 s.               |
| Real-time PCR                   | DNA of standard clones or extracted soil DNA*             | 10 µL of SYBR® Premix Ex Taq™ (Takara, Kyoto, Japan), 0.8 µL of 10 µM each primer (shown in Table 1), 0.2 µL of 20 mg/ml BSA, 0.4 µL of ROX Dye, 1.0 µL of template, and 6.8 µL of SDW.             | 2 min at 94°C, followed by 40 cycles at 94°C for 30 s, at 54°C for 30 s, and at 72°C for 30 s.               |
| PCR-DGGE                        | Extracted soil DNA                                        | 25 µL of Premix Ex Taq™ Hot Start Version, 2 µL of 10 µM each primer (shown in Table 1), 1 µL of 20 mg/mL BSA, 1 µL of template (around 50 ng of soil DNA), and 19 µL of SDW.                       | 2 min at 94°C, followed by 30 cycles at 94°C for 60 s, at 52 to 58°C by 2 °C for 60 s, and at 72°C for 60 s. |

Ten-fold dilution was used to measure *amoA* copy numbers in soil samples.

**Table S3.** Real-time PCR standard curves and calculated amplification efficiency of the three primer sets.

| Forward primer  | Reverse primer     | Template        | Standard curve          | Coefficient of determination | Amplification efficiency (%) |
|-----------------|--------------------|-----------------|-------------------------|------------------------------|------------------------------|
|                 | <i>amoA</i> -2R    | <i>amoA</i> -cc | $y = -3.391x + 35.277$  | $R^2 = 0.9999$               | 97.2                         |
|                 |                    | <i>amoA</i> -gc | $y = -3.551x + 35.49$   | $R^2 = 0.9999$               | 91.3                         |
|                 |                    | <i>amoA</i> -ca | $y = -3.471x + 34.777$  | $R^2 = 1.0000$               | 94.1                         |
|                 |                    | <i>amoA</i> -ga | $y = -3.382x + 31.804$  | $R^2 = 1.0000$               | 97.6                         |
| <i>amoA</i> -1F | <i>amoA</i> -2R-GG | <i>amoA</i> -cc | $y = -3.4421x + 36.115$ | $R^2 = 0.9999$               | 95.2                         |
|                 |                    | <i>amoA</i> -gc | $y = -3.4031x + 36.039$ | $R^2 = 0.9996$               | 96.7                         |
|                 |                    | <i>amoA</i> -ca | $y = -3.5012x + 36.433$ | $R^2 = 0.9999$               | 93.0                         |
|                 |                    | <i>amoA</i> -ga | $y = -3.4455x + 36.217$ | $R^2 = 0.9999$               | 95.1                         |
|                 | <i>amoA</i> -2IR   | <i>amoA</i> -cc | $y = -3.5105x + 35.796$ | $R^2 = 0.9995$               | 92.7                         |
|                 |                    | <i>amoA</i> -gc | $y = -3.4571x + 35.663$ | $R^2 = 0.9991$               | 94.7                         |
|                 |                    | <i>amoA</i> -ca | $y = -3.5559x + 36.379$ | $R^2 = 0.9999$               | 91.1                         |
|                 |                    | <i>amoA</i> -ga | $y = -3.4916x + 36.097$ | $R^2 = 0.9998$               | 93.4                         |
